# Supplementary material
Source: MDPI journal article supplement (https://www.mdpi.com/2227-7390/8/12/2128)
Supplement: s1 [file s1]

# Enhancing Computational Thinking through Interdisciplinary STEAM Activities Using Tablets

Ľubomíra Valovičová <sup>1,\*</sup>, Ján Ondruška <sup>1</sup>, Ľubomír Zelenický <sup>1</sup>, Vlastimil Chytrý <sup>2</sup> and Janka Medová <sup>3,\*</sup>

<sup>1</sup> Department of Physics, Faculty of Natural Sciences, Constantine the Philosopher University in Nitra, Tr. A. Hlinku 1, 949 74 Nitra, Slovakia; jondruska@ukf.sk (J.O.); lzelenicky@ukf.sk (L.Z.)

<sup>2</sup> Department of Preschool and Primary Education, Faculty of Education, Jan Evangelista Purkyně University, 400 01 Ústí nad Labem, Czech Republic; vlastimil.chytry@ujep.cz

<sup>3</sup> Department of Mathematics, Faculty of Natural Sciences, Constantine the Philosopher University in Nitra, Tr. A. Hlinku 1, 949 74 Nitra, Slovakia

\* Correspondence: lvalovicova@ukf.sk (L.V.); jmedova@ukf.sk (J.M.)

Received: 31 October 2020; Accepted: 24 November 2020; Published: date

**Table S1.** Development of the design of the camp in years 2006–2020.

| Year | Overarching topic           | Organization of the camp                                              | Number of participants |
|------|-----------------------------|-----------------------------------------------------------------------|------------------------|
| 2006 | Discovering the elements    | Sessions with experiments                                             | 15                     |
| 2007 | Energy around us            | Sessions with experiments                                             | 21                     |
| 2008 | Physics in the city         | New type of sessions: tour with concepts and problem-solving sessions | 24                     |
| 2009 | Discovering the elements    | Same organization as in 2008                                          | 24                     |
| 2010 | World around us             | New type of sessions: final presentation of performed activities      | 24                     |
| 2011 | Energy around us            | Same organization as in 2010                                          | 24                     |
| 2012 | Water around us             | Connecting and rearranging the sessions                               | 28                     |
| 2013 | Motion around us            | Connecting and rearranging the sessions                               | 28                     |
| 2014 | Tour de Nitra               | Connecting and rearranging the sessions                               | 28                     |
| 2015 | A little bit of everything  | Connecting and rearranging the sessions                               | 24                     |
| 2015 | Samsung physics             | Piloting use of technologies                                          | 32                     |
| 2016 | Water                       | Same organization as in 2015                                          | 32                     |
| 2017 | Energy around us            | Same organization as in 2015                                          | 32                     |
| 2018 | Physics in motion           | Same organization as in 2015                                          | 32                     |
| 2019 | Become a scientist: rockets | Project management                                                    | 32                     |
| 2020 | Motion                      | Same organization as in 2015                                          | 32                     |
